# Supplementary material
Source: publisher figshare collection journal article supplement (https://gsajournals.figshare.com/articles/dataset/_/6619922)
Supplement: Supplementary file 1 [file 1]

**Supplementary References**

1. Abenza, J.F., A. Galindo, A. Pantazopoulou, C. Gil, V. de los Ríos, and M.A. Peñalva, 2010 Aspergillus RabB Rab5 integrates acquisition of degradative identity with the long distance movement of early endosomes. Mol. Biol. Cell. 21: 2756-2769.
2. Araujo-Bazán, L., M.A. Peñalva, and E.A. Espeso, 2008 Preferential localization of the endocytic internalization machinery to hyphal tips underlies polarization of the actin cytoskeleton in Aspergillus nidulans. Mol. Microbiol. 67: 891-905.
3. Hernández-Rodríguez, Y., S. Masuo, D. Johnson, R. Orlando, A. Smith *et al*., 2014 Distinct septin heteropolymers co-exist during multicellular development in the filamentous fungus Aspergillus nidulans. PLoS One. 9: e92819.
4. Karachaliou, M., S. Amillis, M. Evangelinos, A.C. Kokotos, V. Yalelis, and G. Diallinas, 2013 The arrestin-like protein ArtA is essential for ubiquitination and endocytosis of the UapA transporter in response to both broad-range and specific signals. Mol. Microbiol. 88: 301-317.
5. Konzack, S., P.E. Rischitor, C. Enke, and R. Fischer, 2005 The role of the kinesin motor KipA in microtubule organization and polarized growth of Aspergillus nidulans. Mol. Biol. Cell. 16: 497-506.
6. Lindsey, R., S. Cowden, Y. Hernández-Rodríguez, and M. Momany, 2010 Septins AspA and AspC are important for normal development and limit the emergence of new growth foci in the multicellular fungus Aspergillus nidulans. Eukaryot. Cell. 9: 155-163.
7. Martzoukou, O., S. Amillis, A. Zervakou, S. Christoforidis, and G. Diallinas, 2017 The AP-2 complex has a specialized clathrin-independent role in apical endocytosis and polar growth in fungi. Elife. 6: e20083.
8. Nayak, T., E. Szewczyk, C.E. Oakley, A. Osmani, L. Ukil *et al*., 2006 A versatile and efficient gene-targeting system for *Aspergillus nidulans*. Genetics. 172: 1557-1566.
9. Nayak, T., H. Edgerton-Morgan, T. Horio, Y. Xiong, C.P. De Souza CP et al., 2010 Gamma-tubulin regulates the anaphase-promoting complex/cyclosome during interphase. J. Cell. Biol. 190: 317-330.
10. Pantazopoulou, A., and M.A. Peñalva, 2009 Organization and dynamics of the Aspergillus nidulans Golgi during apical extension and mitosis. Mol. Biol. Cell. 20: 4335-4347.
11. Pantazopoulou, A., and M.A. Peñalva, 2011 Characterization of Aspergillus nidulans RabC/Rab6. Traffic. 12: 386-406.
12. Pinar, M., A. Pantazopoulou, H.N.Jr. Arst, and M.A. Peñalva, 2013 Acute inactivation of the Aspergillus nidulans Golgi membrane fusion machinery: correlation of apical extension arrest and tip swelling with cisternal disorganization. Mol. Microbiol. 89: 228-248.
13. Schultzhaus, Z., H. Yan, and B.D. Shaw, 2015 Aspergillus nidulans flippase DnfA is cargo of the endocytic collar and plays complementary roles in growth and phosphatidylserine asymmetry with another flippase, DnfB. Mol. Microbiol. 97: 18-32.
14. Seidel, C., N. Zekert, and R. Fischer, 2012 The Aspergillus nidulans kinesin-3 tail is necessary and sufficient to recognize modified microtubules. PLoS One. 7: e30976.
15. Szewczyk, E., T. Nayak, C.E. Oakley, H. Edgerton, Y. Xiong *et al*., 2006 Fusion PCR and gene targeting in Aspergillus nidulans. *Nat. Protoc.* 1: 3111-3120.
16. Taheri-Talesh, N., T. Horio, L. Araujo-Bazán, X. Dou, E.A. Espeso EA *et al*., 2008 The tip growth apparatus of Aspergillus nidulans. Mol. Biol. Cell. 19: 1439-1449
17. Takeshita, N., D. Mania, S. Herrero de Vega, Y. Ishitsuka, G.U. Nienhaus *et al*., 2013 The cell end marker TeaA and the microtubule polymerase AlpA contribute to microtubule guidance at the hyphal tip cortex of *Aspergillus nidulans* for polarity maintenance. J. Cell. Sci. 126: 5400-5411.
18. Takeshita, N., V. Wernet, M. Tsuizaki, N. Grün, H.O. Hoshi *et al*., 2015 Transportation of Aspergillus nidulans Class III and V Chitin Synthases to the Hyphal Tips Depends on Conventional Kinesin. PLoS One. 10: e0125937.
19. Westfall, P.J., and M. Momany, 2002 Aspergillus nidulans septin AspB plays pre- and postmitotic roles in septum, branch, and conidiophore development. Mol. Biol. Cell. 13:110-118.
20. Zekert, N., and R. Fischer, 2009 The Aspergillus nidulans kinesin-3 UncA motor moves vesicles along a subpopulation of microtubules. Mol. Biol. Cell. 20: 673-684.
